# Supplementary material for: An MPS-Based 50plex Microhaplotype Assay for Forensic DNA Analysis
Source: MDPI journal article supplement (doi:10.3390/genes14040865), 2023-04-04

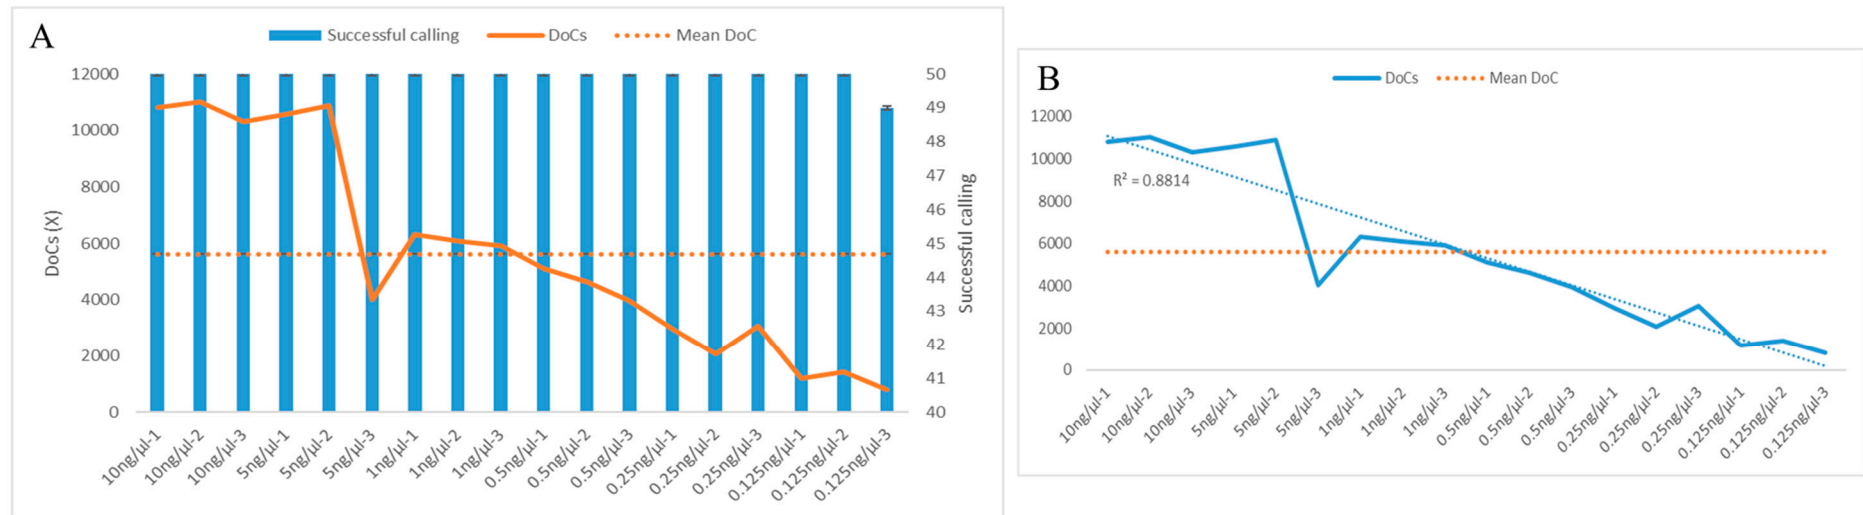

Supplementary Figure S1. Sensitivity results. **(A)** Results of three replicates of 2800M with different inputs (10, 5, 1, 0.5, 0.25, and 0.125 ng). The solid orange line on the right axis represents the overall depth of coverages (DoCs), the dashed orange line represents the average DoC, and the blue bars on the left axis represent the number of successful calling of microhaplotypes (MHs). **(B)** DoCs were negatively correlated with DNA inputs.

A

ID MH\_50 Location (GRCh37/hg19) 20220418-F04-combined\_152-1  
 T1P151 MH-27 chr10:47631395-47631462 47631395.G|47631405.G|47631406.C|47631419.C|47631457.A|47631462.C  
 0007\_31522081900494 P151-152 [P151-F].ab1 - Chromas

File Edit Options Help  
 Open Save Export Print Next Find Sample: 71502406546\_31522081900494 (P151-152)\_P151-F\_PW

T T A C G G T G G C T C A C G C C T G T A A T C C C A G C A C T T T G G G A G G C C A A G G C G G T G A A T C A C G A G G T C A G A G A T C  
 70 80 90 100 110 120 130

(GRCh37/hg19) chr10 chr10:47,631,395-47,631,462 Go

p15.2 p14 p13 p12.31 p12.1 p11.22 p11.1 q11.21 q11.23 q21.1 q21.2 q21.3 q22.1 q22.3 q23.1 q23.31 q24.1 q24.32 q25.1 q25.2 q26.11 q26.2

69 bp  
 47,631,400 bp 47,631,410 bp 47,631,420 bp 47,631,430 bp 47,631,440 bp 47,631,450 bp 47,631,460 bp

9-R... bam Coverage

9-RD-SMT02-A378V1-14(152)-combined sort

## Haplotype calling on IGV

B

Haplotype calling  
by our pipeline

|        |       |                         |                                                                                                                                        |
|--------|-------|-------------------------|----------------------------------------------------------------------------------------------------------------------------------------|
| ID     | MH_50 | Location (GRCh37/hg19)  | 0A-PM1-22R28383_C94                                                                                                                    |
| TIP151 | MH-27 | chr10:47631395-47631462 | 47631395:A 47631405:G 47631406:C 47631419:C 47631457:G 47631462:C<br>47631395:G 47631405:G 47631406:C 47631419:C 47631457:G 47631462:C |

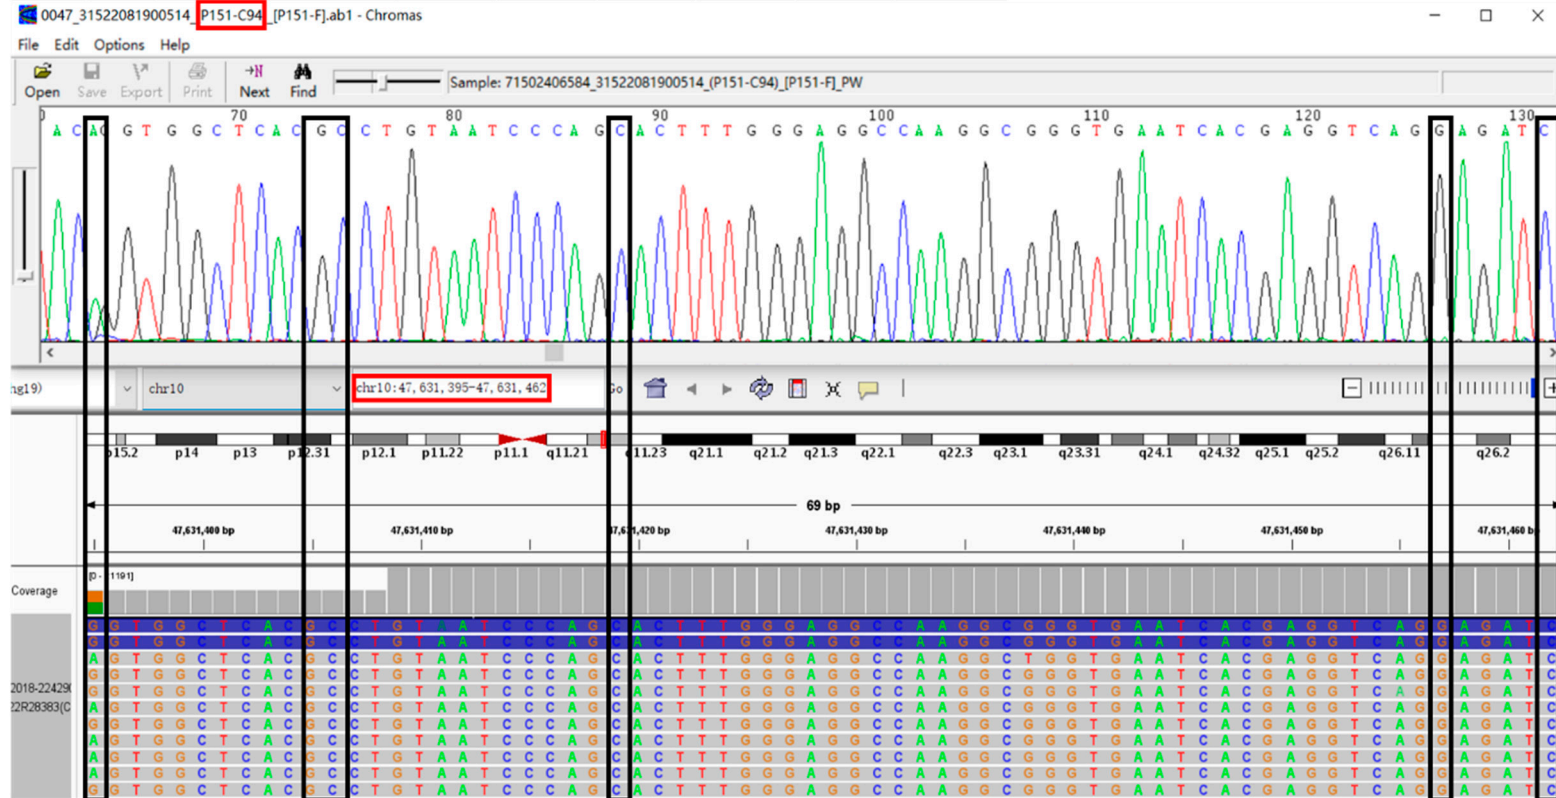

Sanger sequencing  
results

Haplotype calling  
on IGV

C

Haplotype calling  
by our pipeline

| ID    | MH_50 | Location (GRCh37/hg19)   | 20220418-F05-combined_153-1         |
|-------|-------|--------------------------|-------------------------------------|
| T1P14 | MH-4  | chr1:218265683-218265718 | 218265683:C 218265713:G 218265718:C |
|       |       |                          | 218265683:C 218265713:A 218265718:C |

0011\_31522081900496 (P14-153) P14-FJ.ab1 - Chromas

File Edit Options Help

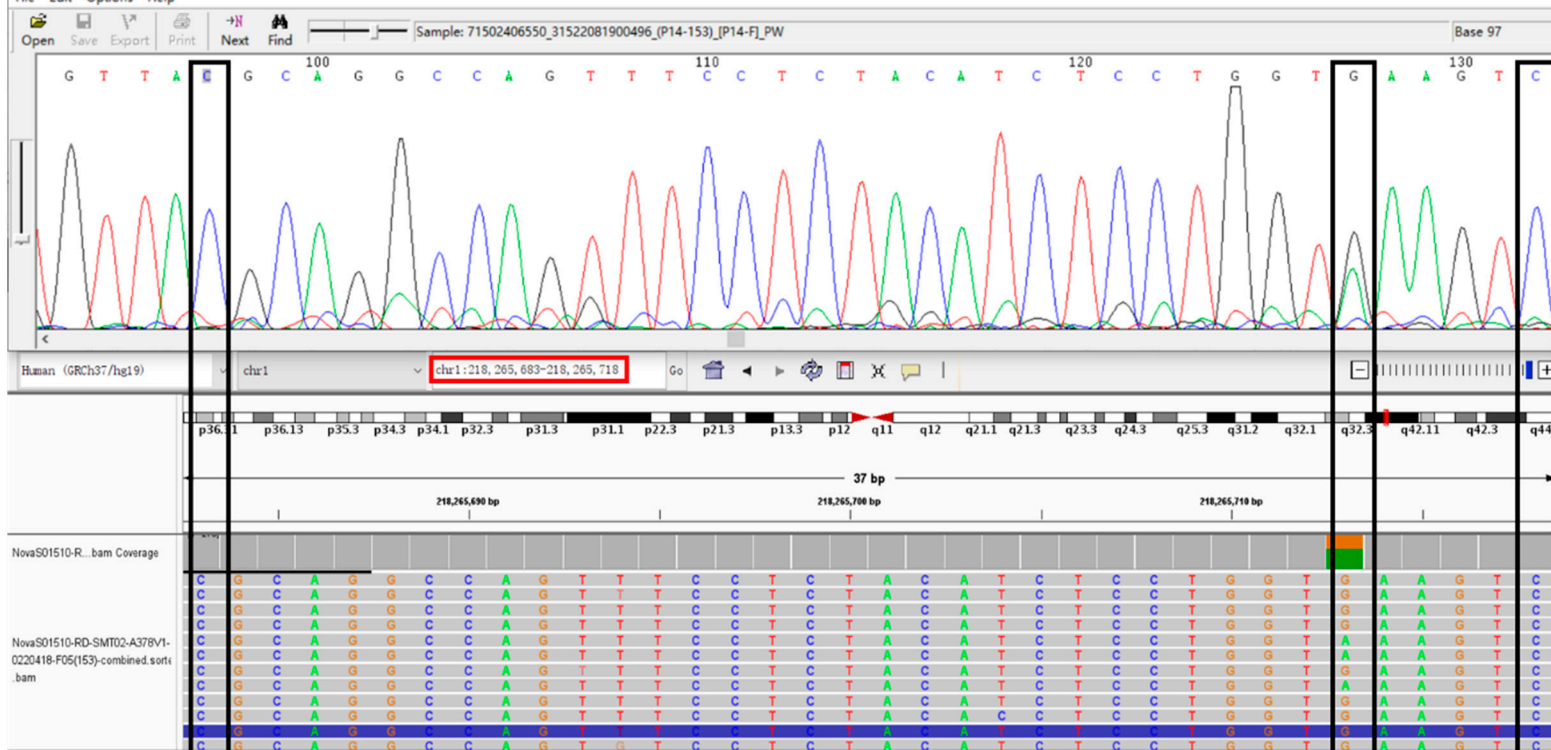

D

Haplotype calling  
by our pipeline

|       |       |                          |                                                                            |
|-------|-------|--------------------------|----------------------------------------------------------------------------|
| ID    | MH_50 | Location (GRCh37/hg19)   | 0A-PM1-22R28383_C94                                                        |
| T1P14 | MH-4  | chr1:218265683-218265718 | 218265683:C 218265713:A 218265718:C<br>218265683:C 218265713.G 218265718:A |

Sanger sequencing  
results

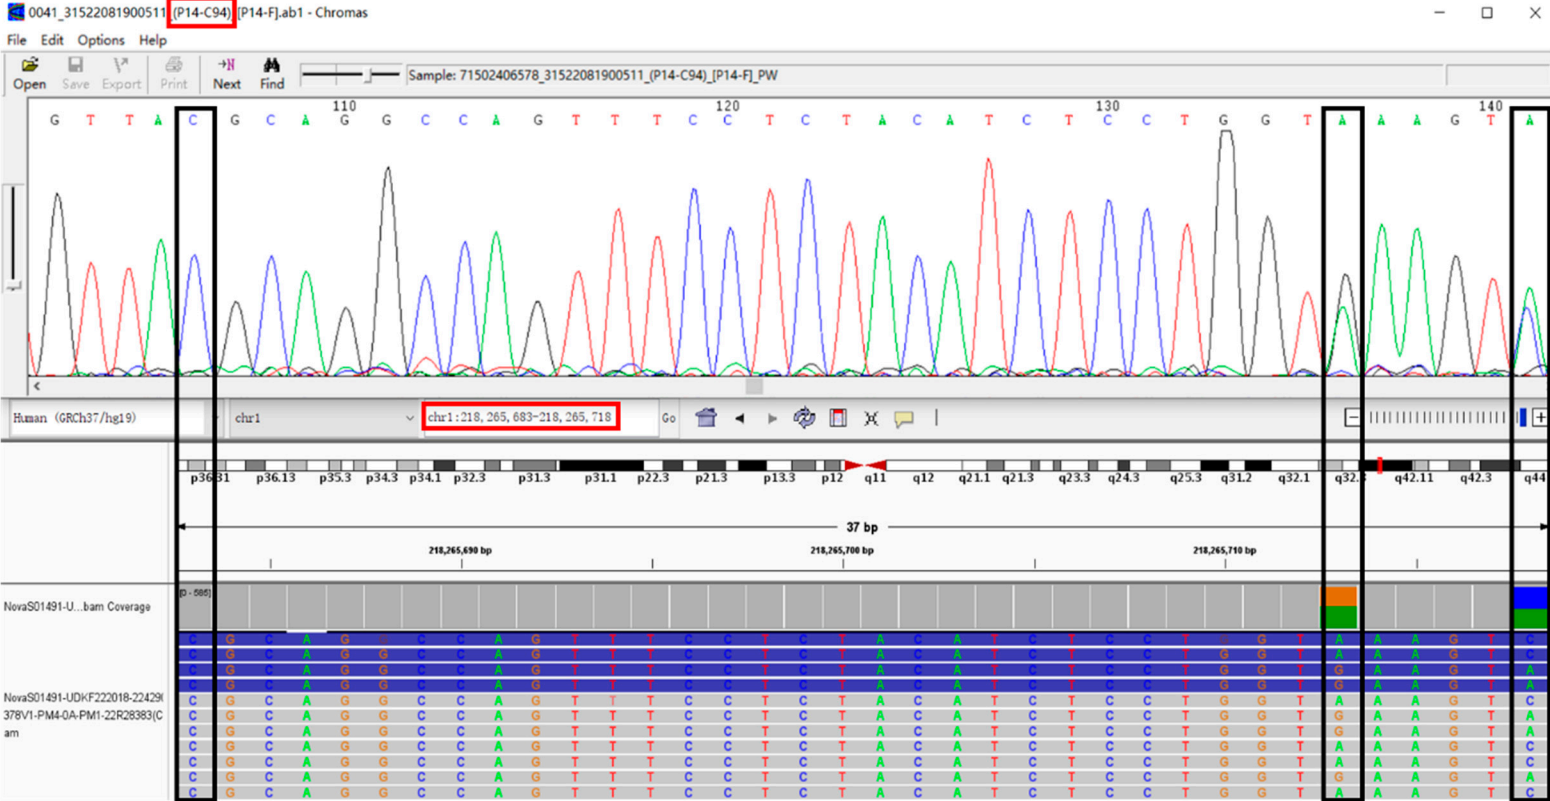

Haplotype calling  
on IGV

Supplementary Figure S2. Several other samples verifying accuracy and consistency. (A) MH-27 and sample 152; (B) MH-27 and sample C94; (C) MH-4 and sample 153; (D) MH-4 and sample C94. Each figure shows the genotypes obtained by our pipeline, Sanger sequencing, and Integrative Genomics Viewer (IGV) from top to bottom. The black boxes indicate the target SNPs. The red boxes represent “MH ID-Sample ID” and “Location (GRCh37/hg19)”,



respectively. The screenshots only display the physical location and length of the target MH.

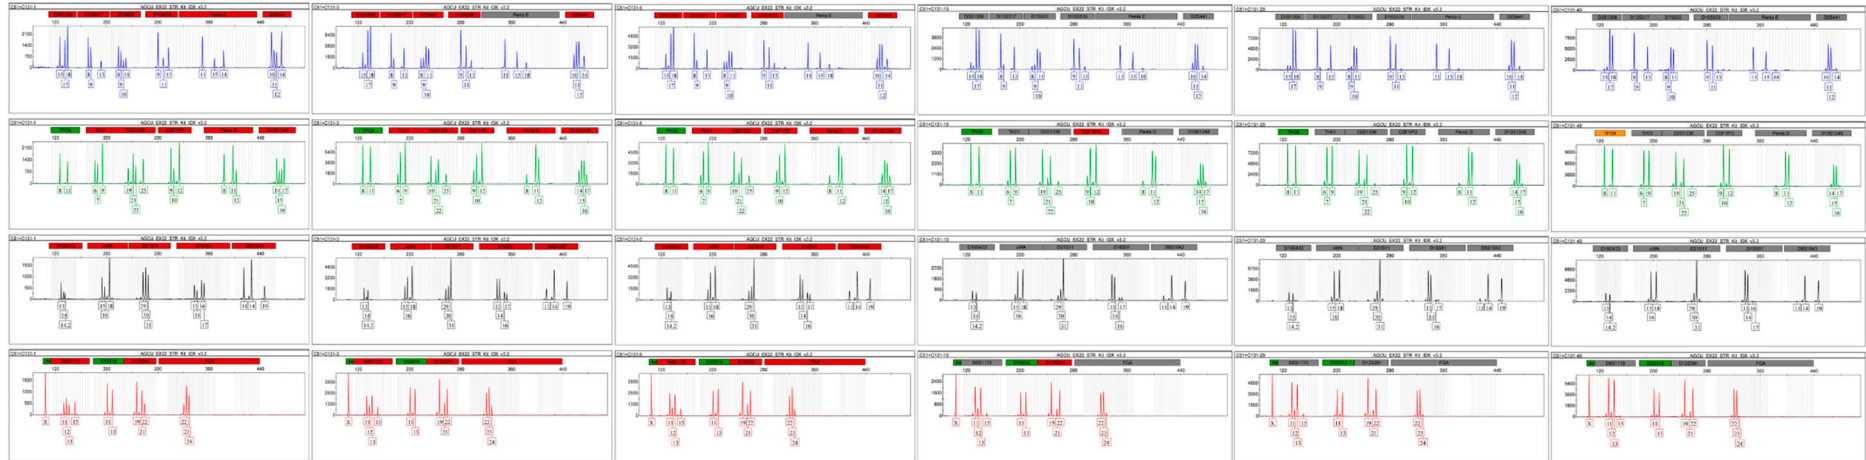

Supplementary Figure S3. STR profiles of two-person mixtures. 1  $\mu$ L of each mixture was used to obtain 1:1, 1:3, 1:5, 1:10, 1:20, and 1:40 genotypes from left to right using the AGCU EX22 Kit (Applied ScienTech, Suzhou, Jiangsu, China).

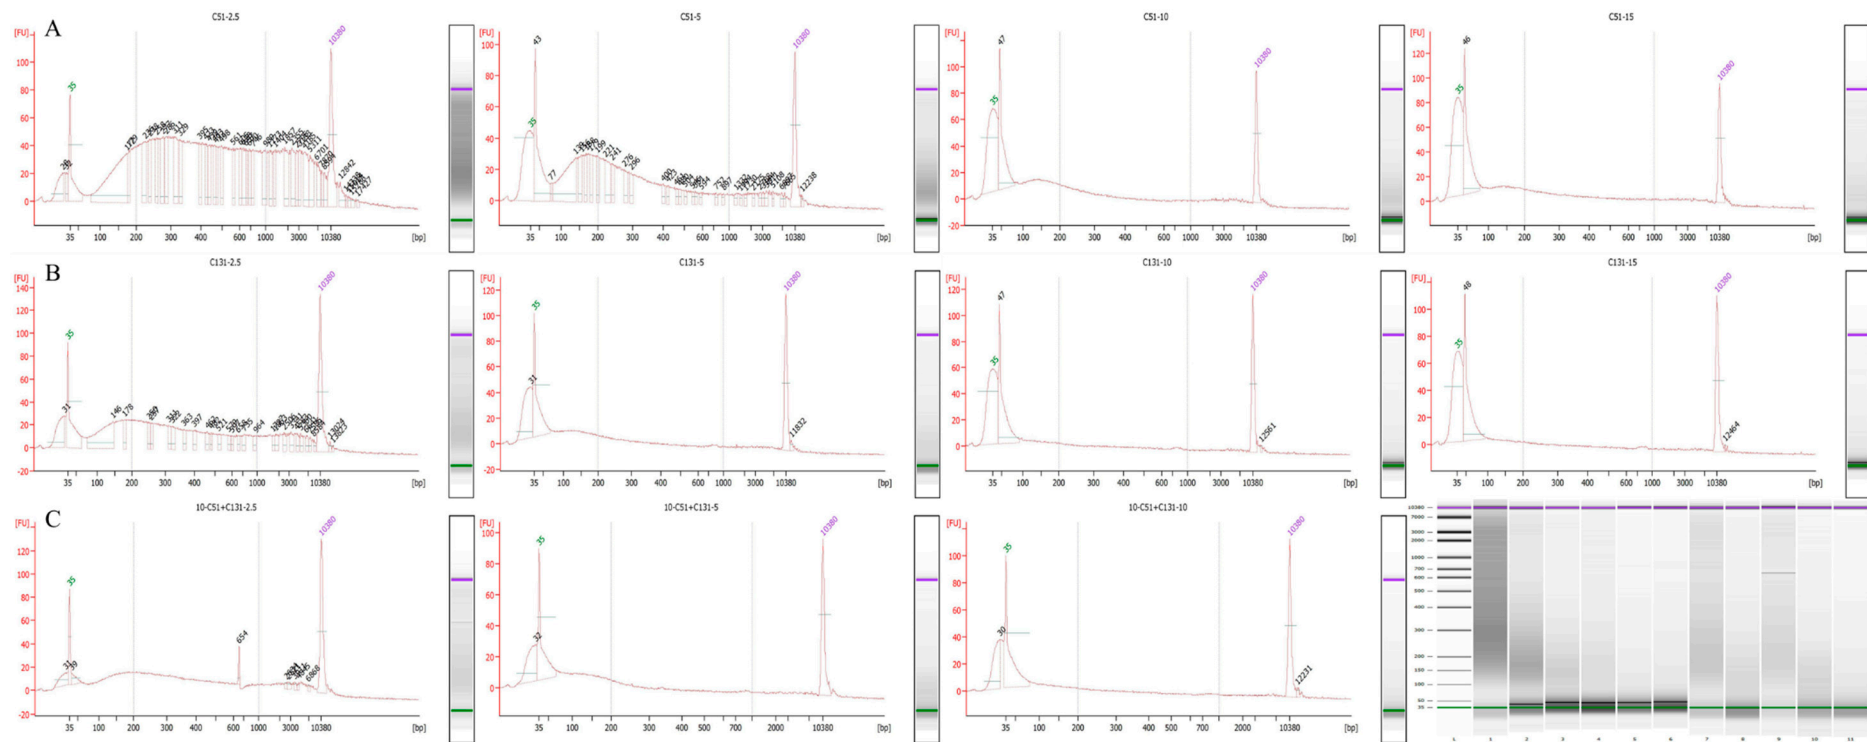

Supplementary Figure S4. Degree of degradation of single and mixed DNA detected using the Agilent 2100 Bioanalyzer (Agilent Technologies, Santa Clara, CA, USA). Random individual DNA C51, C131 and its two 1:10 mixtures were treated with DNase I at 37 °C for 2.5, 5, 10, and 15 min, respectively. Then, 1  $\mu$ L of each was collected to obtain the corresponding electropherogram from left to right using a High Sensitivity DNA Kit (Agilent Technologies, Santa Clara, CA, USA). **(A)** For C51, the degraded fragments were dispersed at 2.5 min, concentrated at 200 bp at 5 min, and then concentrated at about 150 bp. **(B)** For C131, the degraded fragments were dispersed at 2.5 min, concentrated at 150 bp at 5 min, and then concentrated in shorter fragments. **(C)** For 1:10–C51+C131, the degraded fragments were dispersed at 2.5 min, concentrated at 150 bp at 5 min, and then concentrated in shorter fragments. The last picture is a summary of electropherograms. Both degraded single and mixed samples were treated with DNase I to achieve ideal simulated degradation results.

A

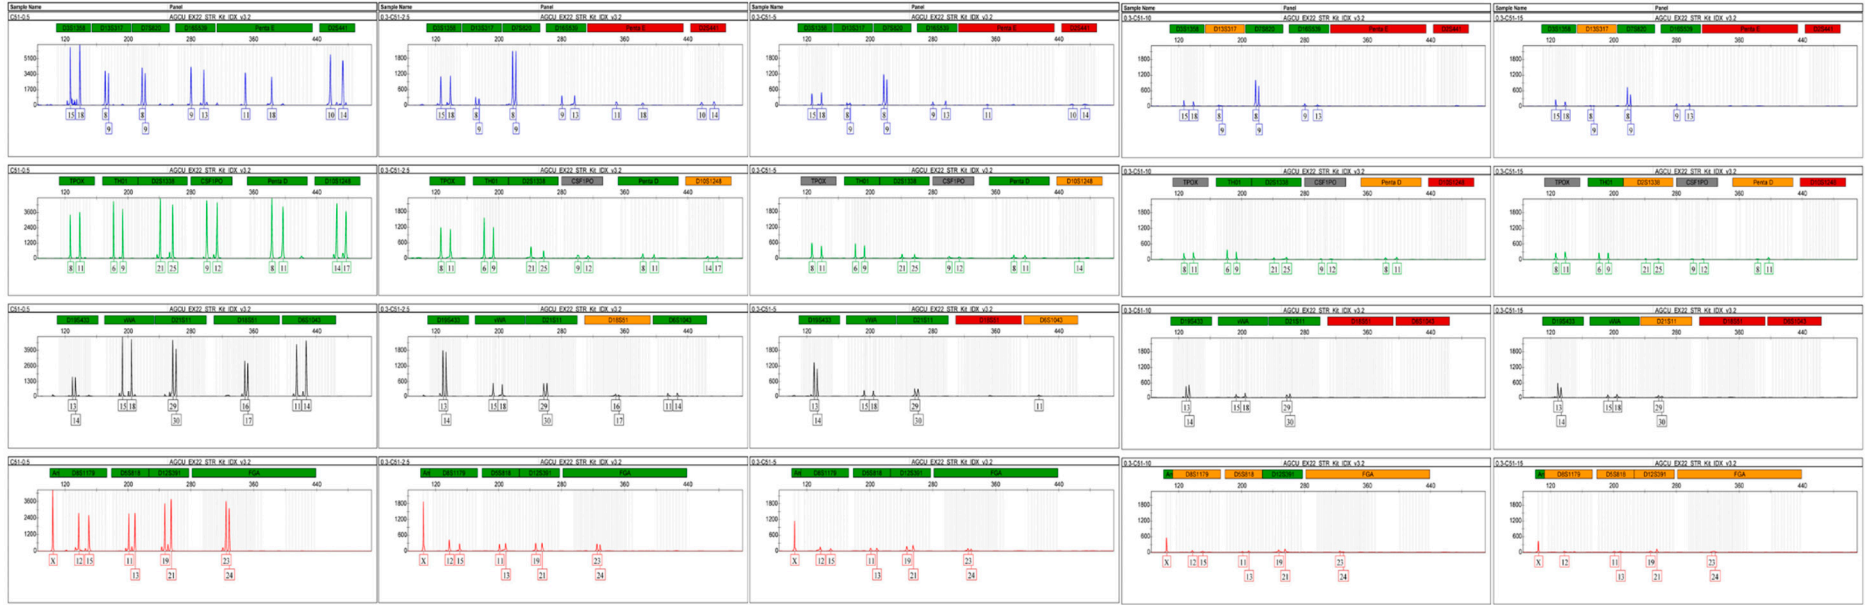



B

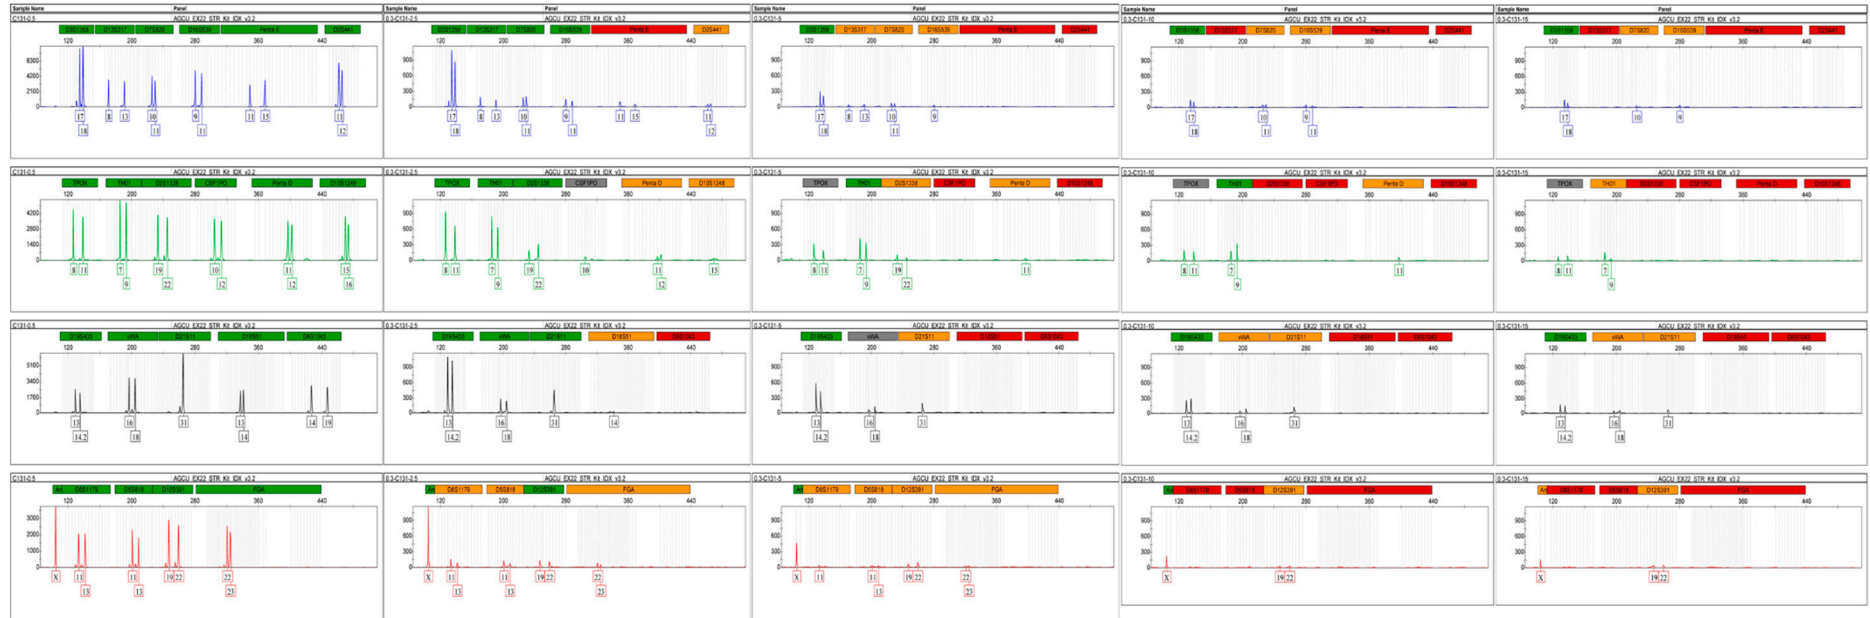

Supplement: s1 [file s1]
